# Supplementary material for: Two tales: Worldwide distribution of Central Asian (CAS) versus ancestral East-African Indian (EAI) lineages of Mycobacterium tuberculosis underlines a remarkable cleavage for phylogeographical, epidemiological and demographical characteristics
Source: PubMed Central journal article supplement (PMC6625721; doi:10.1371/journal.pone.0219706), 2019-07-12

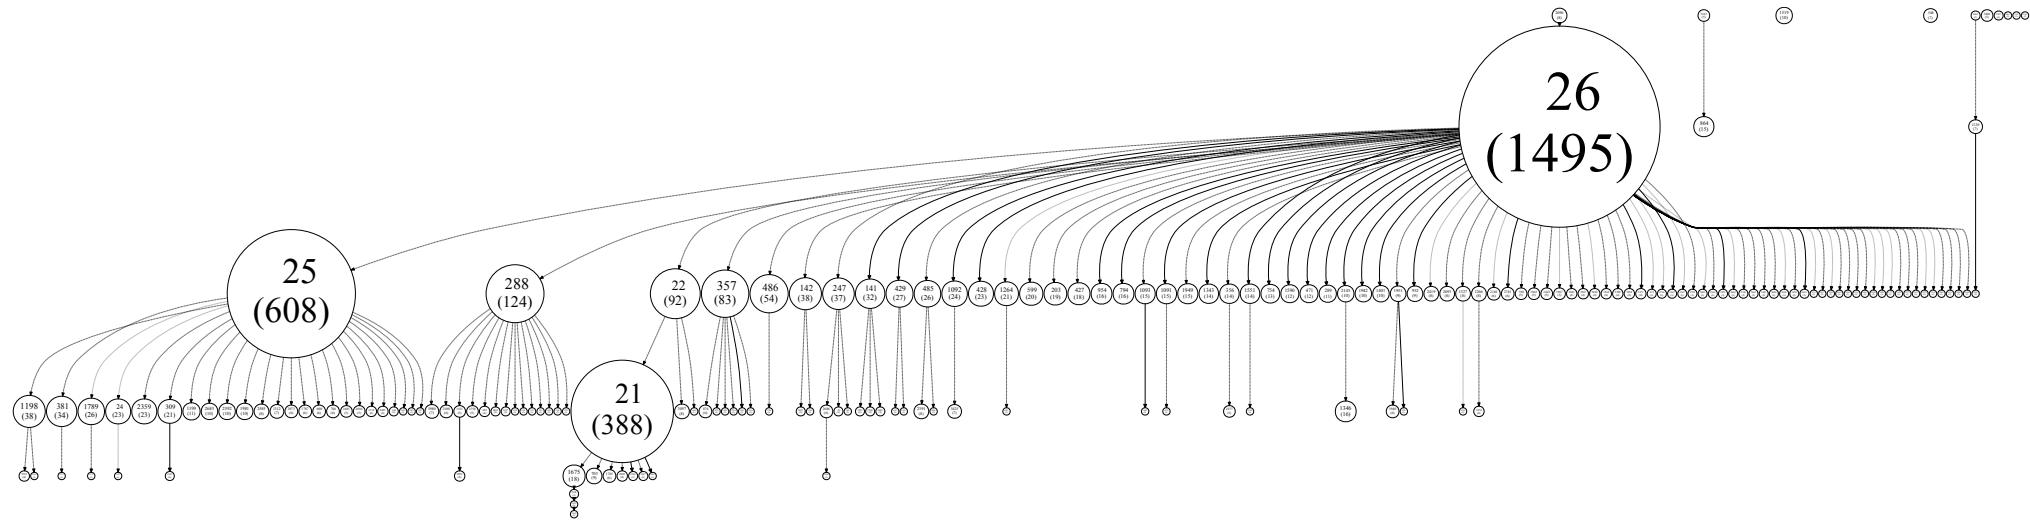

Supplement: pone.0219706.s006.pdf [file pone.0219706.s006.pdf]
