# Supplementary material for: Two tales: Worldwide distribution of Central Asian (CAS) versus ancestral East-African Indian (EAI) lineages of Mycobacterium tuberculosis underlines a remarkable cleavage for phylogeographical, epidemiological and demographical characteristics
Source: PubMed Central journal article supplement (PMC6625721; doi:10.1371/journal.pone.0219706), 2019-07-12
Supplement: pone.0219706.s008.pdf [file pone.0219706.s008.pdf]

Pattern Value: 703777400001771

Percentage of SIT 22

Spoligotype Description:

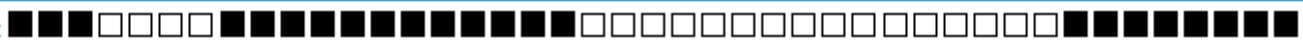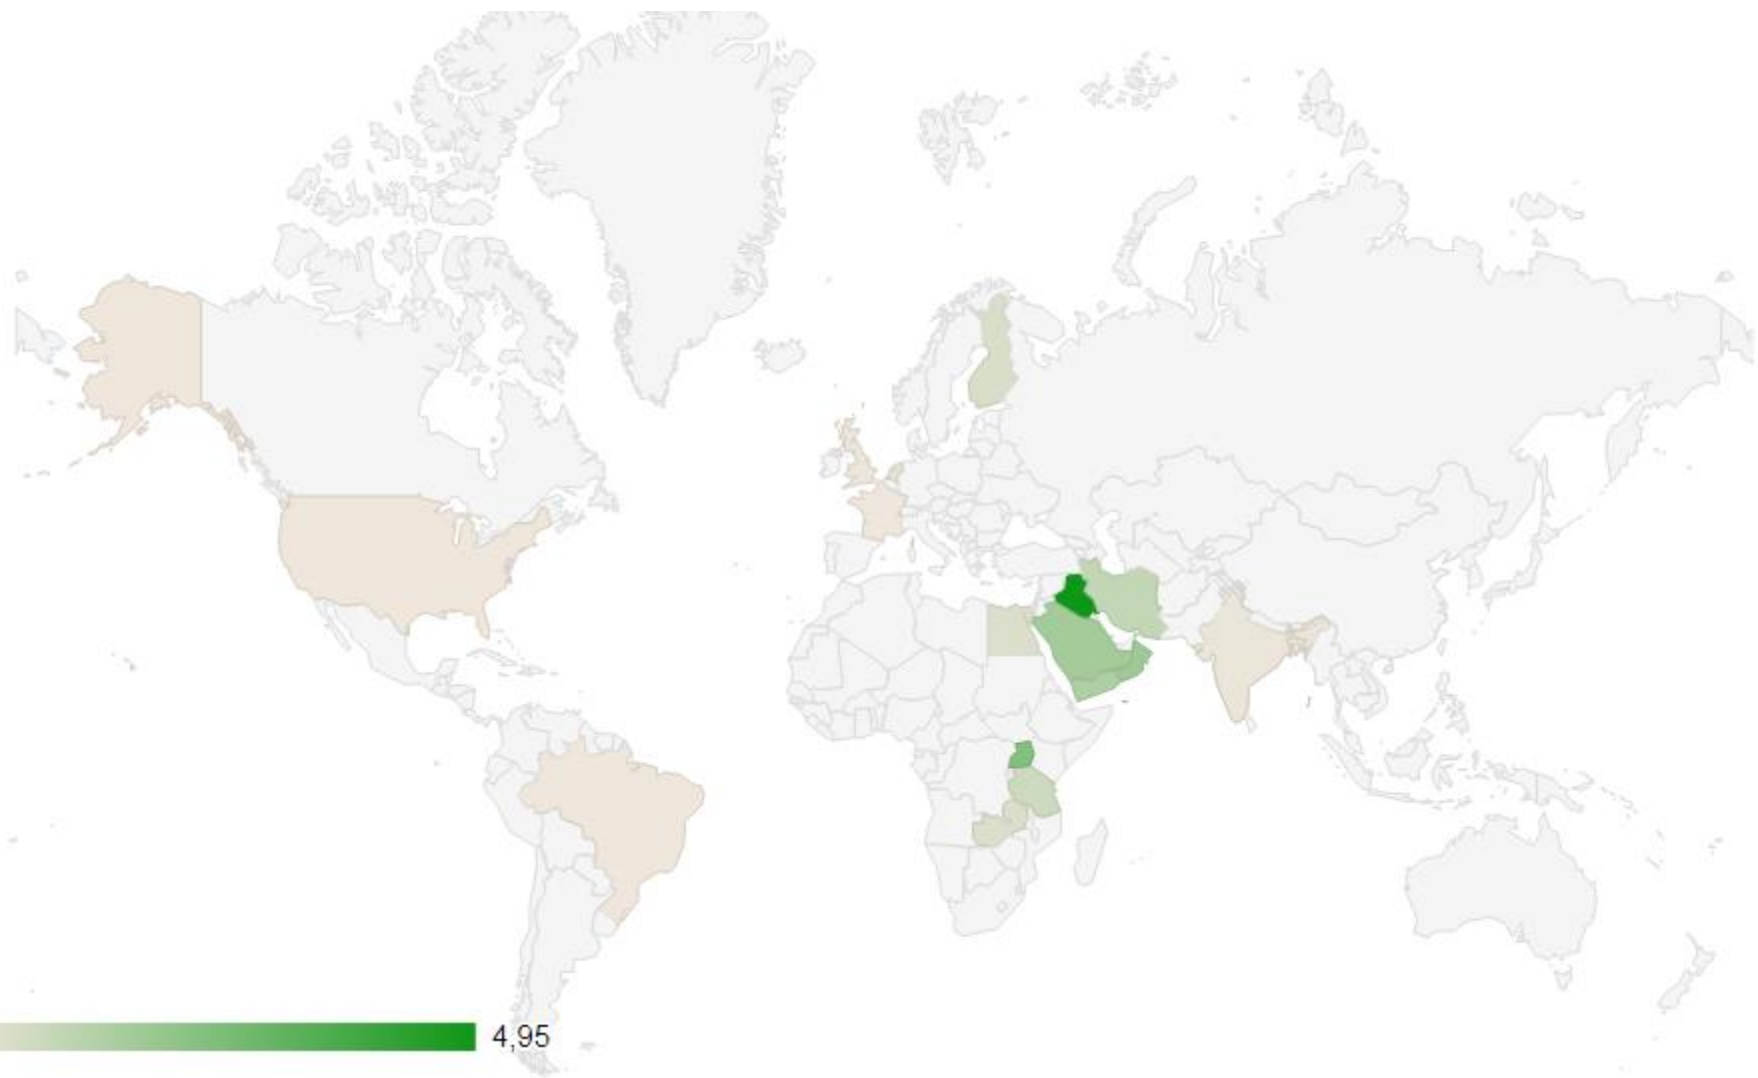

0,01 4,95

Pattern Value: 703777740003171

Percentage of **SIT 25**

Spoligotype Description:

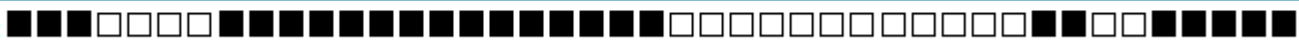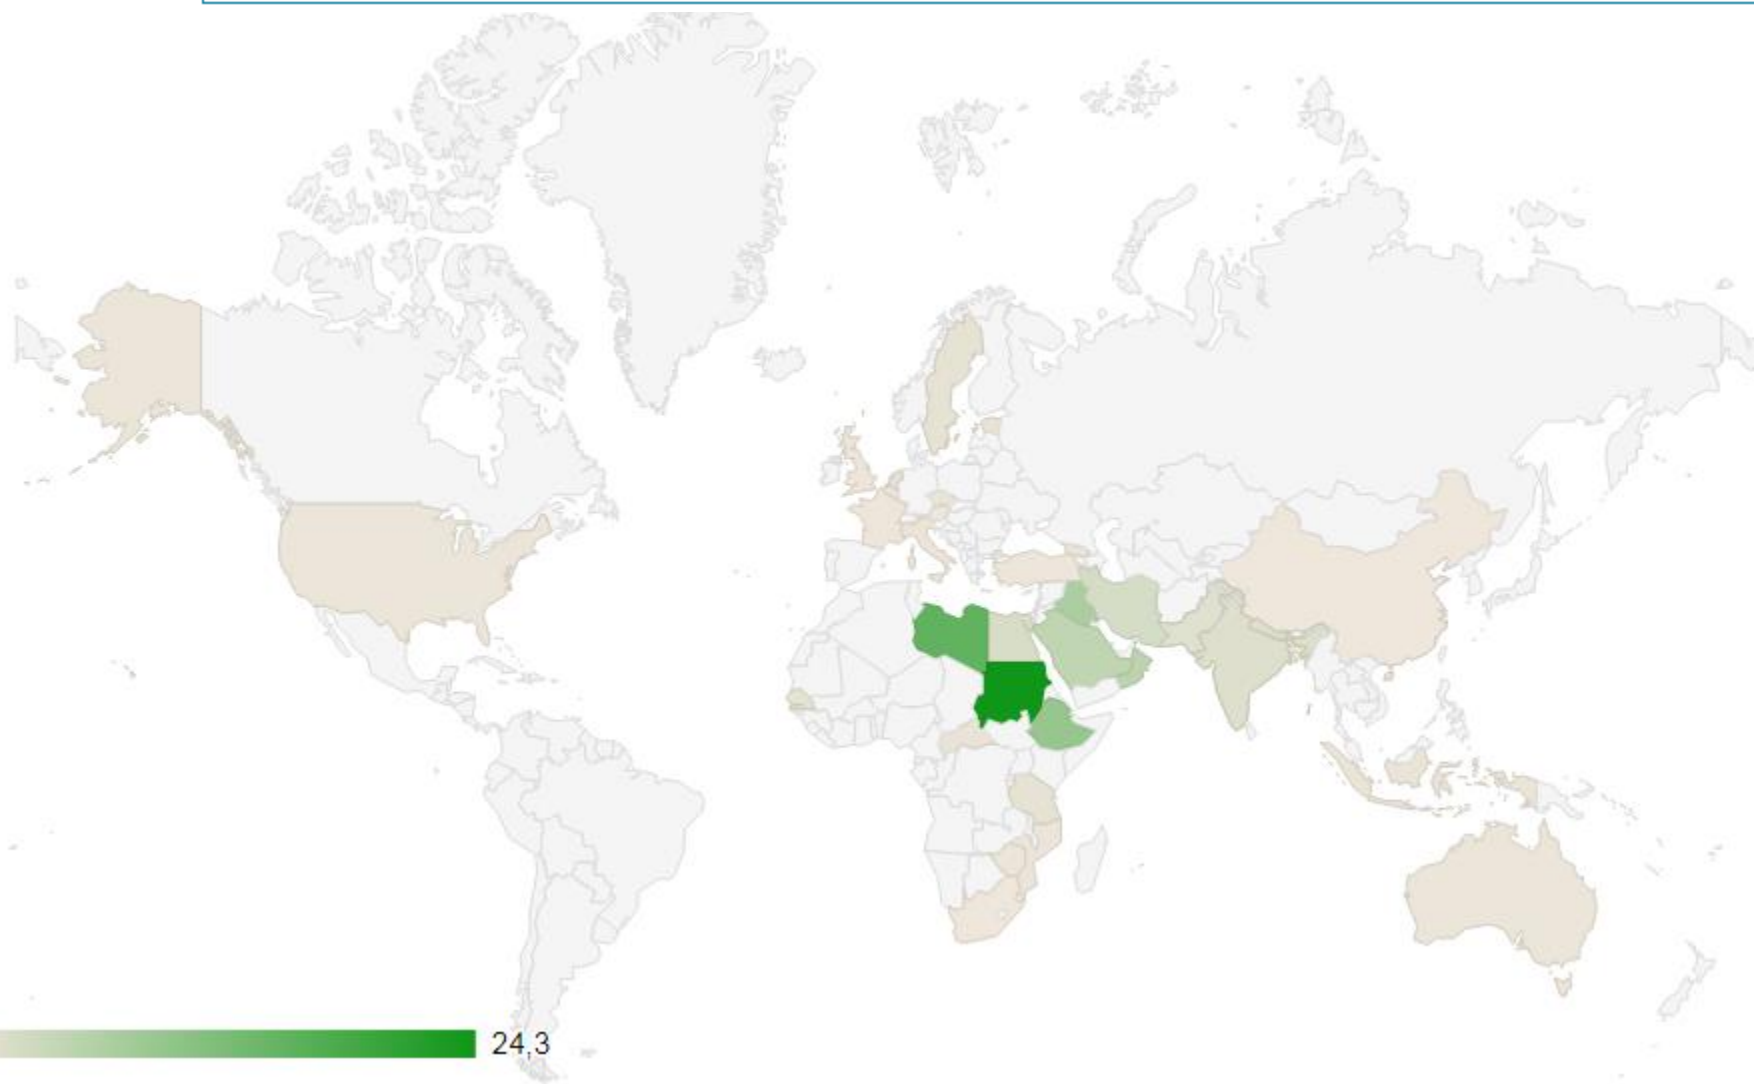

0,03

24,3
